# Supplementary material
Source: Springer Nature journal article supplement (https://www.springermedizin.de/resource/supplementary/12885_2012_3557_MOESM1_ESM.pdf/9463974)
Supplement: MOESM1 [file 9463974]

**Diagnosis of incurable lung cancer**

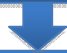

**Study registration**

Baseline assessment (0 month)

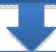

**Randomisation**

Stratified by disease stage, performance status  
& centre

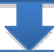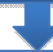

**Arm 1 Intervention**

General health education  
materials + 8 week physical  
activity program

**Arm 2 Control**

General health education  
materials

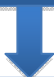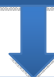

**Follow-up 2, 4, 6 months**

PRO, physical fitness & function

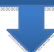

**Survival follow-up**

To death or 3 years post-intervention
